# Supplementary material
Source: publisher figshare collection journal article supplement (https://tandf.figshare.com/ndownloader/files/22231773)
Supplement: Supplementary file 1 [file 22231773]

**Supplementary Table 1. Main characteristics of studies included in the systematic review and meta-analysis**

| Author                                                     | Year of publication | Country                | Study design                       | Sample size | Age (mean±SD) | Milk type                                      |
|------------------------------------------------------------|---------------------|------------------------|------------------------------------|-------------|---------------|------------------------------------------------|
| Christine A Butts (Butts et al., 2018)                     | 2018                | New Zealand            | observational                      | 78          | 31±5          | mature milk                                    |
| R. Barreiro (Barreiro et al., 2018)                        | 2018                | Spain                  | cross country comparison           | 16          | 1.5           | mature milk                                    |
| Mi-ya Su (Su et al., 2018)                                 | 2018                | China                  | cross sectional                    | 900         | 1.5           | mature milk                                    |
| Chang Gao (Gao et al., 2018)                               | 2018                | Cambodia and Australia | cross sectional                    | 267         |               |                                                |
| Uma Nayak (Nayak et al., 2017)                             | 2017                | Bangladesh, India      | cross sectional                    | 471         | 24.6±4.6      | mature milk                                    |
| Hyesook Kim (Kim et al., 2017)                             | 2017                | South Korea            | cross sectional                    | 238         | 31.6±3.2      |                                                |
| Pilar Go´mez-Corte´s (Gómez-Cortés and de la Fuente, 2017) | 2017                | Northern Nigeria       | cross sectional                    | 60          | 29.1±5.9      |                                                |
| Francesca Giuffrida (Giuffrida et al., 2016)               | 2016                | China                  | cross-sectional                    | 539         | 4.5           | 3 types*                                       |
| V Grote (Grote et al., 2016)                               | 2016                | Italy                  | cross sectional                    | 30          | 32.4 ±4.4     | mature milk                                    |
| Jiajing Jiang (Jiang et al., 2016)                         | 2016                | China                  | cross sectional                    | 477         | 27.2±3.5      | 3 types<br>colostrum and<br>mature milk        |
| Krisztina Mihályi (Mihályi et al., 2015)                   | 2015                | Hungary                | cross sectional                    | 87          | 32.9          |                                                |
| Yang Titi (Yang et al., 2014)                              | 2014                | China                  | cross sectional                    | 436         | 27.2±3.9      | 3 types<br>colostrum and<br>mature milk        |
| Angeliki Antonakou (Antonakou et al., 2013)                | 2013                | Greek                  | cross sectional                    | 127         | 32.5±3.1      | mature milk                                    |
| Tali Silberstein (Silberstein et al., 2013)                | 2013                | Israel                 | cross sectional                    | 48          | 31±6          | mature milk                                    |
| Oshra Saphier (Saphier et al., 2013)                       | 2013                | Israel                 | cross sectional                    | 29          |               | mature milk                                    |
| Greta Krešić (Krešić et al., 2013)                         | 2013                | Croatia                | cross sectional                    | 83          | 31.8±4.6      | mature milk<br>transitional and<br>mature milk |
| Akmar Zuraini Daud (Zuraini et al., 2013)                  | 2013                | Malaysia               | cross-sectional                    | 101         |               | transitional and<br>mature milk                |
| Susmita Roy (Roy et al., 2012)                             | 2012                | India                  | cross sectional<br>cross sectional | 135         | 24.18±0.77    | mature milk                                    |
| Heidi J. Urwin (Urwin et al., 2013)                        | 2012                | China                  | observational                      | 125         | 25±0.8        | 3 types                                        |
| Beheshteh Olang (Olang et al., 2012)                       | 2012                | Iran                   | cross sectional                    | 120         | 26.6±6.7      | colostrum                                      |
| Yu-dong Shi (Shi et al., 2011)                             | 2011                | China                  | cross sectional                    | 66          | 28.3±3.9      | 3 types                                        |
| E´va Szabo (Szabó et al., 2010)                            | 2010                | Germany                | birth cohort                       | 462         | 30.8±5.7      | mature milk                                    |

|                                             |      |                        |                 |     |            |                                 |
|---------------------------------------------|------|------------------------|-----------------|-----|------------|---------------------------------|
| Zhong-Xiao Wan (Wan et al., 2010)           | 2010 | China                  | cross sectional | 52  | 2.66       |                                 |
| Yongmei Peng (Peng et al., 2009)            | 2009 | China                  | cross sectional | 102 | 26.96±2.82 | colostrum                       |
| Gu'lhane Samur (Samur et al., 2009)         | 2009 | Turkey                 | cross sectional | 50  | 26.16±5.49 | mature milk                     |
| Flávia Meneses (Meneses et al., 2008)       | 2008 | Brazil                 | cross sectional | 30  | 16.6±1.4   | mature milk                     |
| M. Ribeiro (Ribeiro et al., 2008)           | 2008 | Portugal               | cross sectional | 31  | 30.9±3.9   | transitional and mature milk    |
| YM Peng (Peng et al., 2007)                 | 2007 | China                  | cross sectional | 45  | 27.5±3.2   | colostrum and mature milk       |
| P. Marhol (Marhol et al., 2007)             | 2007 | Roma and Czech         | cross sectional | 64  | 24.38±6.07 | colostrum and transitional milk |
| Remko S. Kuipers (Kuipers et al., 2007)     | 2007 | Tanzania               | cross sectional | 208 | 26±4.16    |                                 |
| I. Golfetto (Golfetto et al., 2007)         | 2007 | Thailand and Korea     | cross sectional | 73  | 4          | mature milk and transition milk |
| Pilar Luna (Luna et al., 2007)              | 2007 | Spain                  | cross sectional | 39  | 3.16       | mature milk                     |
| YM Peng (Peng et al., 2007)                 | 2007 | China                  | cross sectional | 45  | 27.5±3.2   | colostrum and mature milk       |
| A.S. Olafsdottir (Olafsdottir et al., 2006) | 2006 | Iceland                | observational   | 77  | 31±4       | mature milk                     |
| YY Al-Tamer (Al-Tamer and Mahmood, 2006)    | 2006 | Iraq                   | cross sectional | 65  | 28.2±5.7   | mature milk                     |
| Mingyan Xiang (Xiang et al., 2005)          | 2005 | China and Sweden       | cross sectional | 42  | 27.4±0.8   |                                 |
| Erin E Mosley (Mosley et al., 2005)         | 2005 | US                     | cross sectional | 81  |            | transitional milk               |
| M.C. Mari'n (Marín et al., 2005)            | 2005 | Argentina              | cross sectional | 46  |            | mature milk                     |
| Juliana da Cunha (da Cunha et al., 2005)    | 2005 | Brazil                 | cross sectional | 77  | 23.6±4.5   | transitional and mature milk    |
| Aleix Sala-Vila (Sala-Vila et al., 2005)    | 2005 | Spain                  | cross sectional | 30  | 27.33±2.42 | 3 types                         |
| Maurício H.L. Silva (Silva et al., 2005)    | 2005 | Brazil                 | cross sectional | 8   |            | mature milk                     |
| H Mojska (Mojska et al., 2003)              | 2003 | Poland                 | cross sectional | 100 |            | colostrum and mature milk       |
| A López-Lopez (Lopez-Lopez et al., 2002)    | 2002 | Spain                  | cross sectional | 120 | 27.13±3.21 | 3 types                         |
| Julia M Krasevec (Krasevec et al., 2002)    | 2002 | Cuba                   | cross sectional | 73  | 26.8±4     | mature milk                     |
| F. Marangoni (Marangoni et al., 2002)       | 2002 | Italy                  | cross sectional | 95  |            |                                 |
| Pavel Dlouhy (Dlouhý et al., 2002)          | 2002 | Czech Republic, Prague | cross sectional | 35  |            | transitional milk               |
| F. Scopesi (Scopesi et al., 2001)           | 2001 | Italy                  | cross sectional | 34  | 1.66       | 3 types                         |
| Natasha Fidler (Fidler et al., 2001)        | 2001 | Slovenia               | cross sectional | 41  |            | colostrum                       |
| Liwen Wang (Wang et al., 2000)              | 2000 | Japan                  | cross sectional | 20  |            |                                 |

|                                                |      |                     |                 |     |            |                              |
|------------------------------------------------|------|---------------------|-----------------|-----|------------|------------------------------|
| M Xiang (Xiang et al., 2000)                   | 2000 | Sweden              | cross sectional | 19  | 29.5±1     | colostrum and mature milk    |
| Prity Pugo-Gunsam (Pugo-Gunsam et al., 1999)   | 1999 | France              | cross sectional | 28  |            | colostrum and mature milk    |
| M Xiang (Xiang et al., 1999)                   | 1999 | Northern China      | cross sectional | 41  | 26.6 ±1    | mature milk                  |
| Barbara L.Schmeits (Schmeits et al., 1999b)    | 1999 | Nigeria             | cross sectional | 18  | 24.3±4.8   | transitional and mature milk |
| L. Hayat (Hayat et al., 1999)                  | 1999 | Kuwait              | cross sectional | 19  | 24.42±2.04 | mature milk                  |
| Barbara L.Schmeits (Schmeits et al., 1999a)    | 1999 | Nepal               | cross sectional | 48  |            | transitional and mature milk |
| Sheila M Innis (Innis and King, 1999)          | 1999 | Canada              | cross sectional | 62  |            | mature milk                  |
| Ricardo Rueda (Rueda et al., 1998)             | 1998 | Spain and Panama    | cross sectional | 16  |            | 3 types                      |
| G Rocquelin (Rocquelin et al., 1998)           | 1998 | Brazzaville         | cross sectional | 102 | 27±6.8     | mature milk                  |
| Giovanni Serra (Serra et al., 1997)            | 1997 | Italy               | cross sectional | 20  | 2.5        | 3 types                      |
| Z.Y. Chen (Chen et al., 1997)                  | 1997 | Hong Kong and China | cross sectional | 282 |            | 3 types                      |
| Abdullah A. Al-Othman (Al-Othman et al., 1996) | 1996 | Saudi               | cross sectional | 54  | 3.33       | mature milk                  |
| Ruan Chulei (Chulei et al., 1995)              | 1995 | China               | cross sectional | 146 | 3.16       | mature milk                  |
| M. D. Laryea (Laryea et al., 1995)             | 1995 | Sudan               | cross sectional | 77  | 27.8±3.83  | mature milk                  |
| Z.-Y. Chen (Chen et al., 1995)                 | 1995 | Canada              | cross sectional | 198 |            | mature milk                  |
| Maria Makrides (Makrides et al., 1995)         | 1995 | Australia           | cross sectional | 23  |            | mature milk                  |
| Josep Boatella (Boatella et al., 1993)         | 1993 | Spain               | cross sectional | 38  | 3.5        | mature milk                  |
| Ragnhild Rsnneberg (And and Skåra, 1992)       | 1992 | Norway              | cross sectional | 11  |            | colostrum                    |
| E Rudy Boersma (Boersma et al., 1991)          | 1991 | St Lucia            | cross sectional | 36  |            | 3 types                      |
| Abiodun Ogunley (Ogunleye et al., 1991)        | 1991 | Nigeria and Japan   | cross sectional | 73  | 1.33       | mature milk                  |
| B. Koletzko, I (Koletzko et al., 1991)         | 1991 | Nigeria and Germany | cross sectional | 10  |            | mature milk                  |
| Ann Prentice (Prentice et al., 1989)           | 1989 | Gambia              | cross sectional | 23  |            |                              |
| Sheila M. Innis (Innis and Kuhnlein, 1988)     | 1988 | Canada              | cross sectional |     |            | mature milk                  |
| Berthold Koletzko (Koletzko et al., 1988)      | 1988 | Germany             | cross sectional | 15  |            |                              |
| Marlene W Borschel (Borschel et al., 1986)     | 1986 | Egypt and America   | cross sectional | 43  | 28±6.5     | mature milk                  |
| Garry M Kneebone (Kneebone et al., 1985)       | 1985 | Malaysia            | cross sectional | 51  |            | mature milk                  |
| E. Vuori (Vuori et al., 1982)                  | 1982 | Finland             | cross sectional | 33  |            | mature milk                  |
| Robert A. Gibson (Gibson and Kneebone, 1981)   | 1981 | Australia           | cross sectional | 120 |            | colostrum and mature milk    |

|                                               |      |             |                 |     |             |
|-----------------------------------------------|------|-------------|-----------------|-----|-------------|
| Boediman D (Boediman et al., 1979)            | 1979 | Indonesia   | cross sectional | 197 |             |
| Edgar Lauber (Lauber and Reinhardt, 1979)     | 1979 | Ivory coast | cross sectional | 33  |             |
| Barbara A. Underwood (Underwood et al., 1970) | 1970 | Pakistan    | cross sectional | 379 | mature milk |

SD: standard deviation

\*3 types: colostrum, transitional and mature milk

**Supplementary Table 1 (Continued). Main characteristics of studies included in the systematic review and meta-analysis**

| <b>Author</b>                                                | <b>Year of publication</b> | <b>Time of breast milk collection</b>                                     | <b>Method of FA measurement</b>                     | <b>Maternal diet assessment</b> |
|--------------------------------------------------------------|----------------------------|---------------------------------------------------------------------------|-----------------------------------------------------|---------------------------------|
| Christine A Butts (Butts et al., 2018)                       | 2018                       | 6-8 weeks postpartum                                                      | Gas chromatography                                  | Three-day food record           |
| R. Barreiro (Barreiro et al., 2018)                          | 2018                       | 1-5 months postpartum                                                     | Gas chromatography                                  |                                 |
| Mi-ya Su (Su et al., 2018)                                   | 2018                       | at day 42 postpartum                                                      | Gas chromatography                                  | 24-h recall                     |
| Chang Gao (Gao et al., 2018)                                 | 2018                       | at 3 to 4 months postpartum                                               | Capillary gas chromatography                        |                                 |
| Uma Nayak (Nayak et al., 2017)                               | 2017                       | 6 weeks postpartum                                                        | Gas chromatography                                  |                                 |
| Hyesook Kim (Kim et al., 2017)                               | 2017                       |                                                                           | Capillary gas chromatography                        | Three-day food record           |
| Pilar Go´mez-Corte´s (G´omez-Cort´es and de la Fuente, 2017) | 2017                       |                                                                           | High-resolution gas chromatography                  |                                 |
| Francesca Giuffrida (Giuffrida et al., 2016)                 | 2016                       | 0–240 days postpartum, 0–4, 5–11, and 12–30 days, and 2–4, and 4–8 months | Gas chromatography                                  |                                 |
| V Grote (Grote et al., 2016)                                 | 2016                       | at one, two, three and six months postpartum                              | High-performance liquid chromatography              | Three-day weighed record        |
| Jiajing Jiang (Jiang et al., 2016)                           | 2016                       | at the first day, at the day 14 and at the day 42                         | Gas chromatography                                  | 24-h food record                |
| Krisztina Mihályi (Mihályi et al., 2015)                     | 2015                       | at the 6th week and 6th month of lactation                                | Gas chromatography                                  |                                 |
| Yang Titi (Yang et al., 2014)                                | 2014                       | 5-11, 12-30, 31-60, 61-120, 121-240 days postpartum                       | Human milk analyser                                 |                                 |
| Angeliki Antonakou (Antonakou et al., 2013)                  | 2013                       | 1st, 3rd and 6th months postpartum                                        | Gas chromatography                                  | Three records in 64 mothers     |
| Tali Silberstein (Silberstein et al., 2013)                  | 2013                       | 16-20 weeks postpartum                                                    |                                                     |                                 |
| Oshra Saphier (Saphier et al., 2013)                         | 2013                       | 8-12 weeks postpartum                                                     |                                                     |                                 |
| Greta Krešić (Krešić et al., 2013)                           | 2013                       |                                                                           | Gas chromatography                                  | Two 24-h recalls                |
| Akmar Zuraini Daud (Zuraini et al., 2013)                    | 2013                       | between 15 days and 6 months postpartum                                   | Gas chromatography                                  | FFQ                             |
| Susmita Roy (Roy et al., 2012)                               | 2012                       | 7-20 days postpartum                                                      | Gas liquid chromatography                           | FFQ                             |
| Heidi J. Urwin (Urwin et al., 2013)                          | 2012                       | days 3–5 (colostrum), 14 and 28 post-partum                               | Gas chromatography                                  | FFQ                             |
| Beheshteh Olang (Olang et al., 2012)                         | 2012                       | 8 to 72 h after delivery                                                  | Gas chromatography                                  | FFQ                             |
| Yu-dong Shi (Shi et al., 2011)                               | 2011                       | from 3rd to 180 days of lactation.                                        | Gas chromatography                                  |                                 |
| E´va Szabo (Szabó et al., 2010)                              | 2010                       | at the sixth week and sixth month of lactation                            | High resolution capillary gas–liquid chromatography |                                 |
| Zhong-Xiao Wan (Wan et al., 2010)                            | 2010                       | 9–12 weeks postpartum                                                     | Gas chromatography                                  | 24-h recall                     |
| Yongmei Peng (Peng et al., 2009)                             | 2009                       | at day 5                                                                  | Capillary gas–liquid                                | Seven-day food record           |

|                                              |      |                                                           |                                     |                       |
|----------------------------------------------|------|-----------------------------------------------------------|-------------------------------------|-----------------------|
| Gu'lhán Samur (Samur et al., 2009)           | 2009 | at 12–16 weeks postpartum                                 | chromatography                      |                       |
| Flávia Meneses (Meneses et al., 2008)        | 2008 | 30–120 days postpartum                                    | Gas–liquid chromatography           | Three day food record |
| M. Ribeiro (Ribeiro et al., 2008)            | 2008 | at day 7 and weeks 4, 8, 12 and 16 of lactation           | Gas chromatography                  | Three 24-h recalls    |
| YM Peng (Peng et al., 2007)                  | 2007 | at birth, day 5 and 42 postpartum                         | Gas chromatography                  | 24-h recall           |
| P. Marhol (Marhol et al., 2007)              | 2007 | between the 3rd and 10th day after delivery               | Capillary gas–liquid chromatography |                       |
| Remko S. Kuipers (Kuipers et al., 2007)      | 2007 |                                                           | Gas chromatography                  | FFQ                   |
| I. Golfetto (Golfetto et al., 2007)          | 2007 | week 4 post-partum                                        | Capillary gas chromatography        |                       |
| Pilar Luna (Luna et al., 2007)               | 2007 | between 2 and 18 weeks postpartum                         | Gas liquid chromatography           |                       |
| YM Peng (Peng et al., 2007)                  | 2007 | at days 5 and 42                                          | Gas chromatography                  |                       |
| A.S. Olafsdottir (Olafsdottir et al., 2006)  | 2006 | 2- and 4-month ( $\pm 7$ days) postpartum                 | Capillary gas–liquid chromatography |                       |
| YY Al-Tamer (Al-Tamer and Mahmood, 2006)     | 2006 | 2- and 4-month ( $\pm 7$ days) postpartum                 | Gas chromatography                  | 24-h recall           |
| Mingyan Xiang (Xiang et al., 2005)           | 2006 | 5 $\pm$ 1 month postpartum                                | Capillary gas chromatography        |                       |
| Erin E Mosley (Mosley et al., 2005)          | 2005 |                                                           | Gas chromatography                  | Three-day food record |
| M.C. Mari'n (Marín et al., 2005)             | 2005 | During the first month postpartum (11.2 $\pm$ 5.8 day)    | Gas chromatography                  |                       |
| Juliana da Cunha (da Cunha et al., 2005)     | 2005 | 1-3 months postpartum                                     | Gas liquid chromatography           | FFQ                   |
| Aleix Sala-Vila (Sala-Vila et al., 2005)     | 2005 | day 15 $\pm$ 1 postpartum                                 | Gas chromatography                  |                       |
| Mauri 'cio H.L. Silva (Silva et al., 2005)   | 2005 | over the first 1-5 day, at 6-15 day, 16-30 day postpartum | Gas chromatography                  |                       |
| H Mojska (Mojska et al., 2003)               | 2005 | between 4th and 13th lactation weeks                      | Gas chromatography                  | Questionnaire         |
| A Lo 'pez-Lo 'pez (Lopez-Lopez et al., 2002) | 2003 | at 3–4 d, 5–6 wk and 9–10 wk postpartum                   | Gas-liquid chromatography           | Seven-day food record |
| Julia M Krasevec (Krasevec et al., 2002)     | 2002 |                                                           | Gas chromatography                  |                       |
| F. Marangoni (Marangoni et al., 2002)        | 2002 | 2 months postpartum                                       | Gas chromatography                  |                       |
| Pavel Dlouhy (Dlouhý et al., 2002)           | 2002 | first day and at 3 months of lactation                    | Gas chromatography                  |                       |
| F. SCOPESI (Scopesi et al., 2001)            | 2002 | during the first week after delivery                      | Capillary gas chromatography        |                       |
| Natas'a Fidler (Fidler et al., 2001)         | 2001 | on day1, day 4 and 7, and day 14, 21 and 28               | High-resolution gas chromatography  | Food record           |
| Liwen Wang (Wang et al., 2000)               | 2001 | on the third day postpartum                               | Capillary gas-liquid chromatography | 24-h recall           |
| M Xiang (Xiang et al., 2000)                 | 2000 |                                                           | Gas chromatography                  |                       |
| Prity Pugo-Gunsam (Pugo-Gunsam et al., 1999) | 2000 | colostrum, 1 months, 3months postpartum                   | Gas chromatography                  |                       |
|                                              | 1999 | at birth and on day 42                                    | Gas chromatography                  |                       |

|                                                |      |                                                  |                                                                                                 |                          |
|------------------------------------------------|------|--------------------------------------------------|-------------------------------------------------------------------------------------------------|--------------------------|
| M Xiang (Xiang et al., 1999)                   | 1999 | 1 and 3 months postpartum                        | Gas chromatography                                                                              | Three-day food record    |
| Barbara L.Schmeits (Schmeits et al., 1999b)    | 1999 | 10-30 days postpartum                            | Capillary gas-liquid chromatography                                                             |                          |
| L. Hayat (Hayat et al., 1999)                  | 1999 | 6-14 weeks postpartum                            | Split-injection capillary Gas-chromatography                                                    | FFQ and 24-h recall      |
| Barbara L.Schmeits (Schmeits et al., 1999a)    | 1999 | 2-4 weeks postpartum                             | Gas chromatography                                                                              |                          |
| Sheila M Innis (Innis and King, 1999)          | 1999 | 2 months postpartum                              | Gas chromatography                                                                              | Three-day weighed record |
| Ricardo Rueda (Rueda et al., 1998)             | 1998 | 1-5 days, 6-15 days, 16-35 days postpartum       | Gas-liquid chromatography                                                                       |                          |
| G Rocquelin (Rocquelin et al., 1998)           | 1998 | 5±0.5 months postpartum                          | Gas-liquid chromatography                                                                       | FFQ                      |
| Giovanni Serra (Serra et al., 1997)            | 1997 | on the 1st, 4th, 7th, 14th, 21st and 28th day    | High-resolution gas chromatography                                                              |                          |
| Z.Y. Chen (Chen et al., 1997)                  | 1997 | first 3 d followed by 2, 4, 6 weeks postpartum   | Gas-liquid chromatography                                                                       | Three-day food record    |
| Abdullah A. Al-Othman (Al-Othman et al., 1996) | 1996 | 3-4 months of lactation                          | Gas-liquid chromatography                                                                       |                          |
| Ruan Chulei (Chulei et al., 1995)              | 1995 | 2-6 months postpartum                            | Gas chromatography                                                                              | FFQ and 24-h recall      |
| M. D. Laryea (Laryea et al., 1995)             | 1995 | 2-24 months postpartum (mean range: 7.8)         | Capillary gas chromatography                                                                    | ad-libitum diet          |
| Z.-Y. Chen (Chen et al., 1995)                 | 1995 | 3 to 4 week after parturition                    | Combination of capillary gas-liquid chromatography and silver nitrate thin-layer chromatography |                          |
| Maria Makrides (Makrides et al., 1995)         | 1995 | 6-30th weeks postpartum                          | Capillary gas chromatography                                                                    |                          |
| Josep Boatella (Boatella et al., 1993)         | 1993 | 20-30 days after birth                           | Capillary gas chromatography                                                                    | ad-libitum diet          |
| Ragnhild Rsnneberg (And and Skåra, 1992)       | 1992 | on day 2, 3 or 4 postpartum                      | Gas chromatography                                                                              |                          |
| E Rudy Boersma (Boersma et al., 1991)          | 1991 | 0-4, 5-9, 10-30 days postpartum                  | Split-injection capillary gas chromatography                                                    |                          |
| Abiodun OGUNLEY (Ogunleye et al., 1991)        | 1991 | 60-100 days postpartum                           | Gas chromatography                                                                              |                          |
| B. Koletzko, I (Koletzko et al., 1991)         | 1991 | 3-5 months postpartum                            | High-resolution capillary gas-liquid chromatography                                             |                          |
| Ann Prentice (Prentice et al., 1989)           | 1989 |                                                  | Gas-liquid chromatography                                                                       | Low fat (16%)            |
| Sheila M. Innis (Innis and Kuhnlein, 1988)     | 1988 | 4-28 weeks postpartum                            | Gas-liquid chromatography                                                                       |                          |
| Berthold Koletzko (Koletzko et al., 1988)      | 1988 |                                                  | Gas chromatography                                                                              | 24-h recall              |
| Marlene W Borschel (Borschel et al., 1986)     | 1986 | First 6 months of lactation                      | Gas-liquid chromatography                                                                       | FFQ                      |
| Garry M Kneebone (Kneebone et al., 1985)       | 1985 | one and 6 months postpartum                      | Gas chromatography                                                                              | FFQ and 24-h recall      |
| E. Vuori (Vuori et al., 1982)                  | 1982 | 6-8 weeks postpartum, 17-22 weeks postpartum     | Gas chromatography                                                                              | Seven-day food record    |
| Robert A. Gibson (Gibson and Kneebone, 1981)   | 1981 | early (day 3-5), later (day 40 -45) in lactation | Gas liquid chromatography                                                                       |                          |
| Boediman D (Boediman et al., 1979)             | 1979 |                                                  | Gas chromatography                                                                              |                          |
| Edgar Lauber (Lauber and Reinhardt, 1979)      | 1979 |                                                  |                                                                                                 |                          |

Barbara A. Underwood (Underwood et al.,  
1970)

1970 at 6, 9, 12, 18, and 24 months postpartum

Gas chromatography

---

FA: fatty acid, FFQ: food frequency questionnaire



**Supplementary Table 2. MOOSE Statement - Reporting Checklist for meta-analyses of observational studies**

| Reporting Criteria                                                                      | Reported (Yes/No)                | Reported on Page                                        |
|-----------------------------------------------------------------------------------------|----------------------------------|---------------------------------------------------------|
| <b>Reporting of Background</b>                                                          |                                  |                                                         |
| Problem definition                                                                      | Yes                              | 3                                                       |
| Hypothesis statement                                                                    | Yes                              | 3                                                       |
| Description of Study Outcome(s)                                                         | Yes                              | 3                                                       |
| Type of exposure or intervention used                                                   | Yes                              | 3                                                       |
| Type of study design used                                                               | Yes                              | 4                                                       |
| Study population                                                                        | Yes                              | 3                                                       |
| <b>Reporting of Search Strategy</b>                                                     |                                  |                                                         |
| Qualifications of searchers (eg, librarians and investigators)                          | Yes                              | 4                                                       |
| Search strategy, including time period included in the synthesis and keywords           | Yes                              | 4                                                       |
| Effort to include all available studies, including contact with authors                 | Yes                              | 4                                                       |
| Databases and registries searched                                                       | Yes                              | 4                                                       |
| Search software used, name and version, including special features used (eg, explosion) | Yes                              | 6                                                       |
| Use of hand searching (eg, reference lists of obtained articles)                        | Yes                              | 4                                                       |
| List of citations located and those excluded, including justification                   | Yes                              | 6, 13                                                   |
| Method for addressing articles published in languages other than English                | No (we used only English papers) | 4 (English language was a criteria of included studies) |
| Method of handling abstracts and                                                        | No                               | 4 (There was no related                                 |

|                                                                                                                                            |                                                                                                                                                      |                                                                                                  |
|--------------------------------------------------------------------------------------------------------------------------------------------|------------------------------------------------------------------------------------------------------------------------------------------------------|--------------------------------------------------------------------------------------------------|
| unpublished studies                                                                                                                        |                                                                                                                                                      | abstracts and unpublished studies to include in the current meta-analysis)                       |
| Description of any contact with authors                                                                                                    | No                                                                                                                                                   | We access the pdf version of all related papers, thus there was no need to contact with authors. |
| <b>Reporting of Methods</b>                                                                                                                |                                                                                                                                                      |                                                                                                  |
| Description of relevance or appropriateness of studies assembled for assessing the hypothesis to be tested                                 | Yes                                                                                                                                                  | 4                                                                                                |
| Rationale for the selection and coding of data (eg, sound clinical principles or convenience)                                              | Yes                                                                                                                                                  | 4,5                                                                                              |
| Documentation of how data were classified and coded (eg, multiple raters, blinding, and interrater reliability)                            | Yes                                                                                                                                                  | 4,5                                                                                              |
| Assessment of confounding (eg, comparability of cases and controls in studies where appropriate                                            | Yes (There were no cases and controls, but possible sources of heterogeneity were explored and adopted by sensitivity analysis and meta regression.) | 5,6                                                                                              |
| Assessment of study quality, including blinding of quality assessors; stratification or regression on possible predictors of study results | Yes                                                                                                                                                  | 4,5                                                                                              |
| Assessment of heterogeneity                                                                                                                | Yes                                                                                                                                                  | 5,6                                                                                              |
| Description of statistical methods (eg, complete description of fixed or random                                                            | Yes                                                                                                                                                  | 5,6                                                                                              |

|                                                                                                                                                                                              |                                  |                                                         |
|----------------------------------------------------------------------------------------------------------------------------------------------------------------------------------------------|----------------------------------|---------------------------------------------------------|
| effects models, justification of whether the chosen models account for predictors of study results, dose-response models, or cumulative meta-analysis) in sufficient detail to be replicated |                                  |                                                         |
| Provision of appropriate tables and graphics                                                                                                                                                 | Yes                              | 13-30                                                   |
| <b>Reporting of Results</b>                                                                                                                                                                  |                                  |                                                         |
| Table giving descriptive information for each study included                                                                                                                                 | Yes                              | 14-21                                                   |
| Results of sensitivity testing (eg, subgroup analysis)                                                                                                                                       | Yes                              | 26-29                                                   |
| Indication of statistical uncertainty of findings                                                                                                                                            | Yes                              | 5,6                                                     |
| <b>Reporting of Discussion</b>                                                                                                                                                               |                                  |                                                         |
| Quantitative assessment of bias (eg, publication bias)                                                                                                                                       | Yes                              | 6                                                       |
| Justification for exclusion (eg, exclusion of non-English-language citations)                                                                                                                | No (we used only English papers) | 4 (English language was a criteria of included studies) |
| Assessment of quality of included studies                                                                                                                                                    | Yes                              | 4,11                                                    |
| <b>Reporting of Conclusions</b>                                                                                                                                                              |                                  |                                                         |
| Consideration of alternative explanations for observed results                                                                                                                               | Yes                              | 8-11                                                    |
| Generalization of the conclusions (ie, appropriate for the data presented and within the domain of the literature review)                                                                    | Yes                              | 11                                                      |
| Guidelines for future research                                                                                                                                                               | Yes                              | 11                                                      |
| Disclosure of funding source                                                                                                                                                                 | Yes                              | 31                                                      |
